# Supplementary material for: Umbilical Cord Mesenchymal-Stem-Cell-Derived Exosomes Exhibit Anti-Oxidant and Antiviral Effects as Cell-Free Therapies
Source: MDPI journal article supplement (doi:10.3390/v15102094), 2023-10-15
Supplement: s1 [file s1]

# Supplementary Materials

Supplementary Figure 1

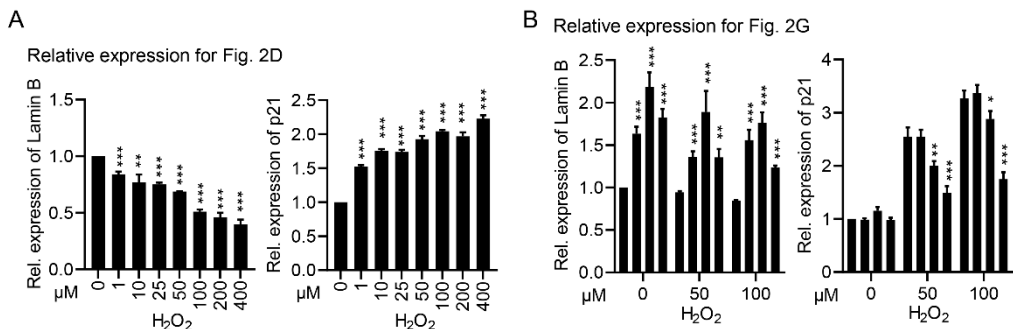

Supplementary Figure 2

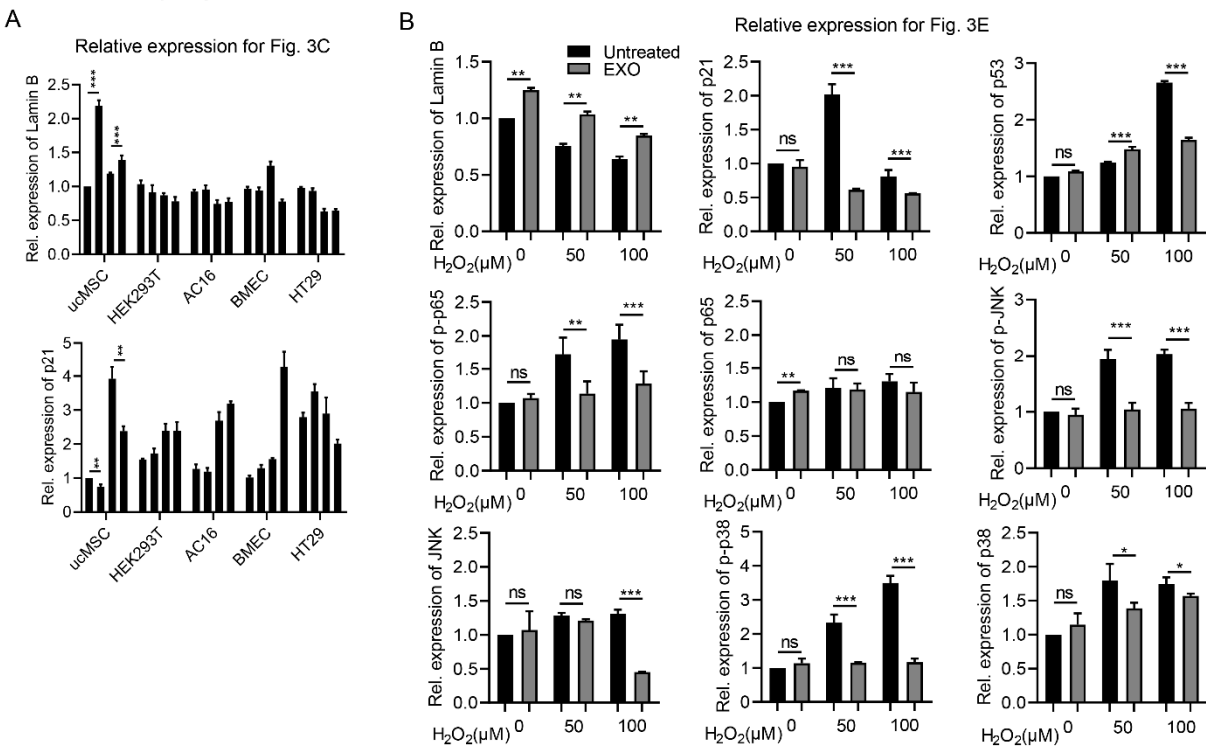

### Supplementary Figure 3

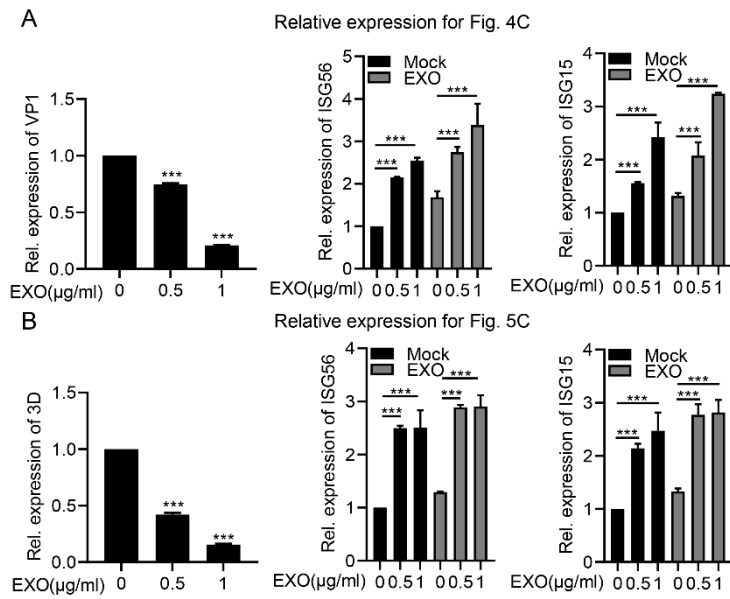

### Supplementary Figure 1-3. Relative expression of indicated protein by Western blot analyses.

Protein expression relative to internal control in each figure is quantified using Image J software.

Data are expressed as mean  $\pm$  SD. ns, nonsignificant; \*,  $P < 0.05$ ; \*\*,  $P < 0.01$ ; \*\*\*,  $P < 0.001$ .

Statistical significance was determined by a Student's  $t$ -test.
